# Supplementary material for: Hsa_circ_0000520 suppresses vasculogenic mimicry formation and metastasis in bladder cancer through Lin28a/PTEN/PI3K signaling
Source: PubMed Central journal article supplement (PMC11378395; doi:10.1186/s11658-024-00627-0), 2024-09-05

A

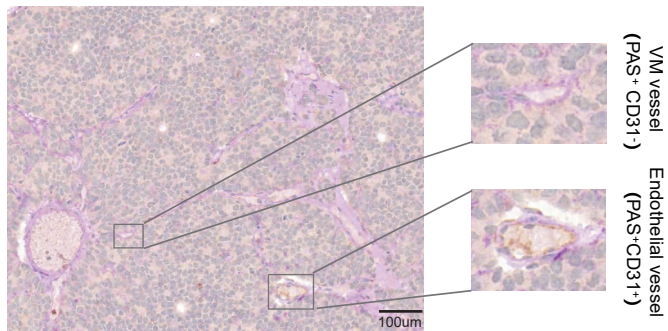

C

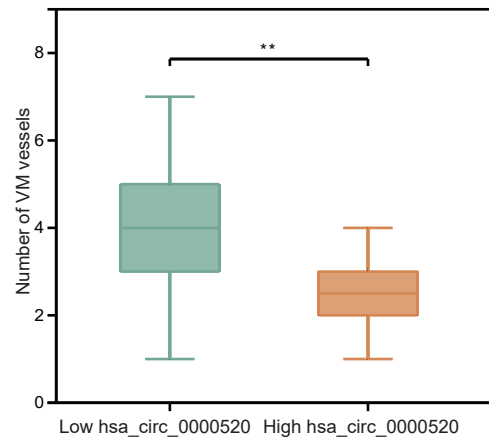

B

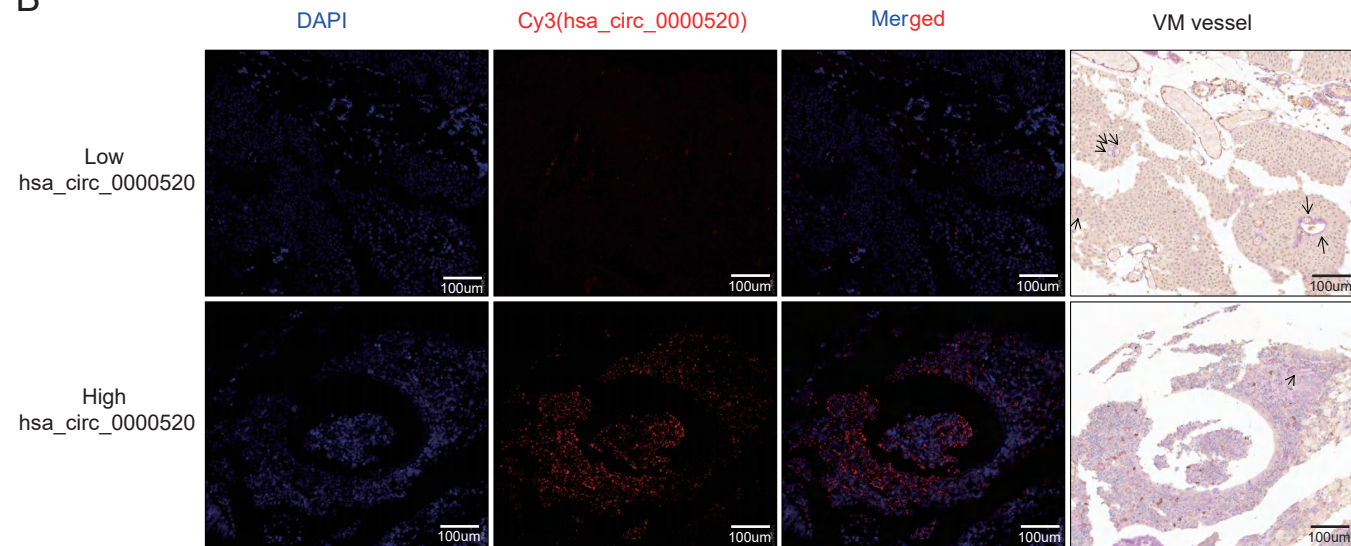

Supplement: 11658_2024_627_MOESM1_ESM.pdf [file 11658_2024_627_MOESM1_ESM.pdf]
